# Supplementary material
Source: PubMed Central journal article supplement (PMC2659476)
Supplement: NIHMS4827-supplement-suppmat1.pdf [file NIHMS4827-supplement-suppmat1.pdf]

## Supplementary Figure 1

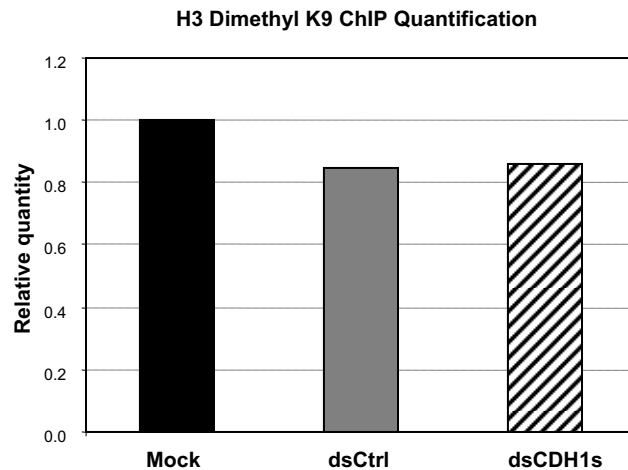

**Supplementary Figure 1** Real time ChIP analyses of *hMLH1* promoter in HCT116 cells. Real time PCR was performed on the same immunoprecipitated DNA fractions as Fig. 2c & d for the *hMLH1* promoter using the forward primer (5'-GTCCGCCACATACCGCTCGTA-3') and the reverse primer (5'-CAAGATGGAAGTCGACGAGGC-3'). H3 dimethyl K9 enrichment at the *hMLH1* promoter in mock, dsCtrl, and dsCDH1s treated cells. There was no preferential enrichment for this histone modification at the *hMLH1* promoter in the dsCDH1 treated cells.
